# Supplementary material for: Identification and Validation of the lncRNA BACE1-AS as Immune-Related Influencing Factor in Tumorigenesis following Pan-Carcinoma Analysis
Source: Hindawi journal article supplement (doi:10.1155/2021/1589864), 2021-12-08

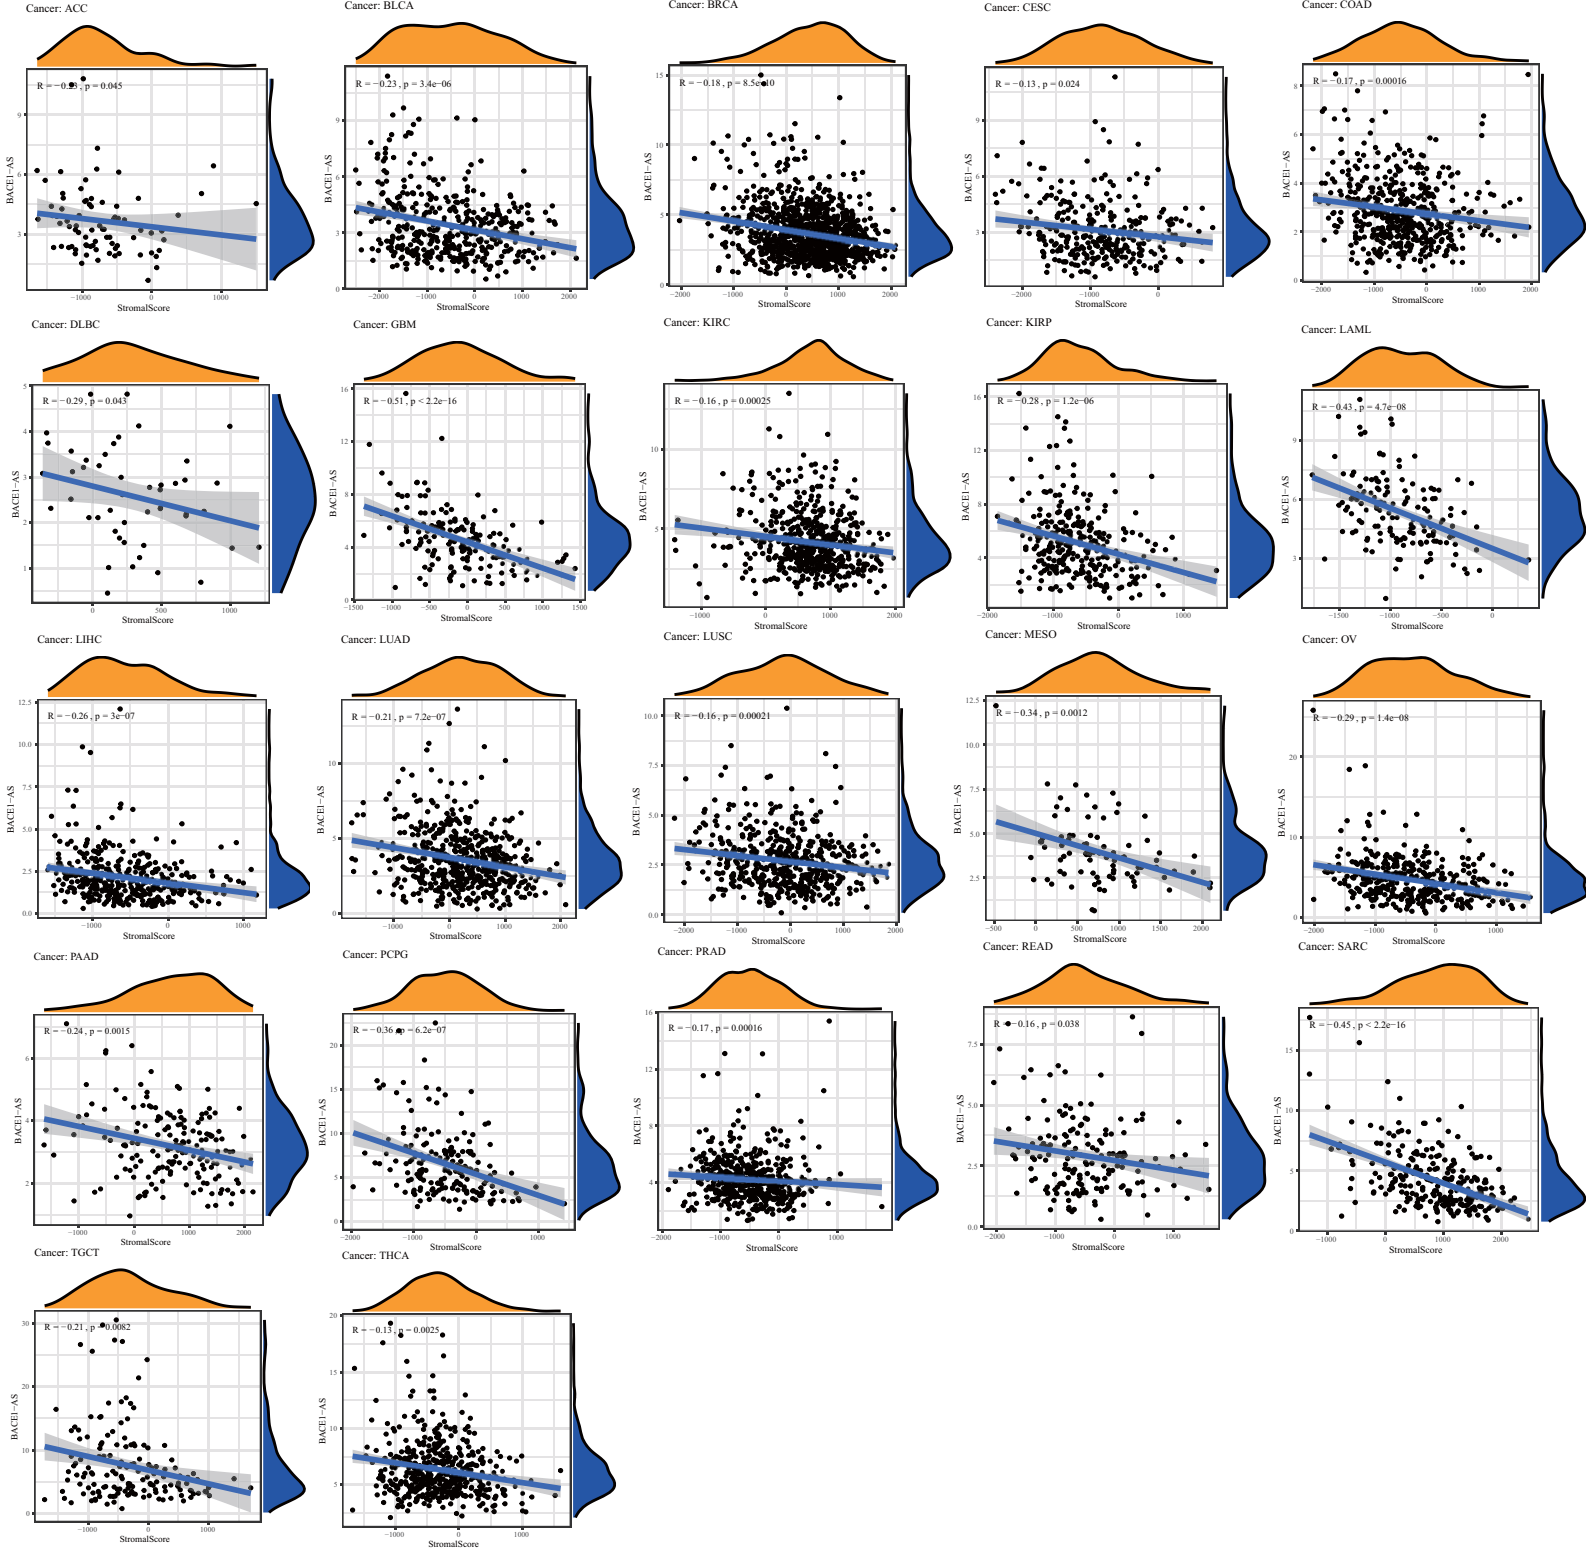

Supplement: f3 [file 1589864.f3.pdf]
